# Supplementary material
Source: HighWire-hosted journal article supplement (https://bmjopen.bmj.com/content/9/4/e026727)
Supplement: inline-supplementary-material-1 [file inline-supplementary-material-1.pdf]

## **Appendix 1: draft eligibility criteria**

### Level 1 screening

1. Does this study include adults aged 18 years and over?

Yes \_\_\_\_\_

No \_\_\_\_\_

Unclear \_\_\_\_\_

2. Is the setting ICU or a critical care unit?

Yes \_\_\_\_\_

No \_\_\_\_\_

Unclear \_\_\_\_\_

3. Did the included patients receive a PU prevention intervention?

Yes \_\_\_\_\_

No \_\_\_\_\_

Unclear \_\_\_\_\_

4. Is the PUs prevention intervention being compared to other PUs prevention programs or usual care or standard care?

Yes \_\_\_\_\_

No \_\_\_\_\_

Unclear \_\_\_\_\_

5. Is this a RCT study?

Yes \_\_\_\_\_

No \_\_\_\_\_

Unclear\_\_\_\_\_

If your answer is “NO” to any of these questions, the study/citation will be excluded. If your answer is “Yes” or “Unclear”, the study/citation will be included. To ensure all studies have been captured, we will keep track of potentially relevant reviews and scan their reference lists.

#### Level 2 screening

1. Does this study include adults aged 18 years and over?

Yes\_\_\_\_\_

No\_\_\_\_\_

Unclear\_\_\_\_\_

2. Is the setting ICU or a critical care unit?

Yes\_\_\_\_\_

No\_\_\_\_\_

Unclear\_\_\_\_\_

3. Did the included patients receive a PU prevention intervention?

Yes\_\_\_\_\_

No\_\_\_\_\_

Unclear\_\_\_\_\_

4. Is the PUs prevention intervention being compared to other PUs prevention programs or usual care or standard care?

Yes\_\_\_\_\_

No\_\_\_\_\_

Unclear\_\_\_\_\_

5. Is this a RCT study?

Yes\_\_\_\_\_

No\_\_\_\_\_

Unclear\_\_\_\_\_

6. Does this study report any of the following outcomes: the incidence of PUs, PU severity, Number of PUs per patient, adverse events caused by the prevention intervention or intervention-related harms?

Yes\_\_\_\_\_

No\_\_\_\_\_

Unclear\_\_\_\_\_

If your answer is “NO” to any of these questions, the study/citation will be excluded. If your answer “Yes” or “Unclear”, the study/citation will be included. To ensure all studies have been captured, we will keep track of potentially relevant reviews and scan their reference lists.
